# Supplementary material for: Highly active repeat-mediated recombination in the mitogenome of the holoparasitic plant Aeginetia indica
Source: Front Plant Sci. 2022 Sep 21;13:988368. doi: 10.3389/fpls.2022.988368 (PMC9532969; doi:10.3389/fpls.2022.988368)
Supplement: Supplementary file 2 [file Table_2.xlsx]

## Sheet: m30_rep_table
Supplementary Excel file 2 Characteristics of repetitive sequences identified on the Aeginetia indica mitogenome
repats	length	start	end	orientation
Repeat_1	16366	157324	173689	plus
Repeat_1	16366	385595	369230	minus
Repeat_2	237	35083	35319	plus
Repeat_2	237	214884	215120	plus
Repeat_3	233	139988	140220	plus
Repeat_3	233	307385	307153	minus
Repeat_4	186	218022	218207	plus
Repeat_4	186	363847	363662	minus
Repeat_5	181	34524	34704	plus
Repeat_5	181	306975	307155	plus
Repeat_6	127	143359	143485	plus
Repeat_6	127	282487	282613	plus
Repeat_7	111	271386	271496	plus
Repeat_7	111	391032	391142	plus
Repeat_8	111	51569	51679	plus
Repeat_8	111	148770	148880	plus
Repeat_9	93	132337	132429	plus
Repeat_9	93	350389	350481	plus
Repeat_10	91	248295	248385	plus
Repeat_10	91	333044	333134	plus
Repeat_11	91	133390	133480	plus
Repeat_11	91	229495	229405	minus
Repeat_12	86	113076	113161	plus
Repeat_12	86	239690	239605	minus
Repeat_13	85	143234	143318	plus
Repeat_13	85	282362	282446	plus
Repeat_14	80	1	80	plus
Repeat_14	80	23255	23176	minus
Repeat_15	70	108928	108997	plus
Repeat_15	70	250957	250888	minus
Repeat_16	65	206091	206155	plus
Repeat_16	65	233025	232961	minus
Repeat_17	65	94761	94825	plus
Repeat_17	65	266846	266910	plus
Repeat_18	62	26018	26079	plus
Repeat_18	62	47810	47749	minus
Repeat_19	60	300291	300350	plus
Repeat_19	60	358853	358912	plus
Repeat_20	59	270337	270395	plus
Repeat_20	59	293571	293513	minus
Repeat_21	56	312721	312776	plus
Repeat_21	56	390735	390680	minus
Repeat_22	55	13338	13392	plus
Repeat_22	55	56010	56064	plus
Repeat_23	54	260729	260782	plus
Repeat_23	54	337095	337042	minus
Repeat_24	54	16658	16711	plus
Repeat_24	54	310032	309979	minus
Repeat_25	51	249005	249055	plus
Repeat_25	51	266810	266760	minus
Repeat_26	51	170846	170896	plus
Repeat_26	51	342948	342898	minus
Repeat_26	51	372073	372023	minus
Repeat_27	51	143489	143539	plus
Repeat_27	51	282617	282667	plus
Repeat_28	51	128293	128343	plus
Repeat_28	51	167545	167495	minus
Repeat_28	51	375374	375424	plus
Repeat_29	50	28750	28799	plus
Repeat_29	50	284822	284773	minus
Repeat_30	50	8054	8103	plus
Repeat_30	50	286350	286399	plus
Repeat_31	49	77118	77166	plus
Repeat_31	49	314410	314362	minus
Repeat_32	49	43962	44010	plus
Repeat_32	49	298761	298713	minus
Repeat_33	48	74730	74777	plus
Repeat_33	48	176625	176578	minus
Repeat_34	48	8057	8104	plus
Repeat_34	48	254615	254662	plus
Repeat_35	47	400437	400483	plus
Repeat_35	47	406823	406869	plus
Repeat_36	47	8057	8103	plus
Repeat_36	47	254615	254661	plus
Repeat_36	47	286353	286399	plus
Repeat_37	47	99156	99202	plus
Repeat_37	47	150995	151041	plus
Repeat_38	46	324121	324166	plus
Repeat_38	46	327883	327838	minus
Repeat_39	46	47901	47946	plus
Repeat_39	46	54160	54115	minus
Repeat_40	46	39315	39360	plus
Repeat_40	46	321847	321892	plus
Repeat_41	46	35869	35914	plus
Repeat_41	46	37374	37419	plus
Repeat_42	45	324575	324619	plus
Repeat_42	45	413905	413861	minus
Repeat_43	45	312141	312185	plus
Repeat_43	45	359334	359378	plus
Repeat_44	45	143121	143165	plus
Repeat_44	45	282249	282293	plus
Repeat_45	45	130313	130357	plus
Repeat_45	45	136295	136339	plus
Repeat_46	45	43916	43960	plus
Repeat_46	45	298807	298763	minus
Repeat_47	44	143702	143745	plus
Repeat_47	44	281864	281907	plus
Repeat_48	44	18524	18567	plus
Repeat_48	44	355330	355373	plus
Repeat_49	44	16095	16138	plus
Repeat_49	44	127915	127872	minus
Repeat_50	43	312357	312399	plus
Repeat_50	43	409383	409425	plus
Repeat_51	43	164106	164148	plus
Repeat_51	43	357271	357313	plus
Repeat_51	43	378813	378771	minus
Repeat_52	43	162802	162844	plus
Repeat_52	43	284805	284763	minus
Repeat_52	43	380117	380075	minus
Repeat_53	43	55797	55839	plus
Repeat_53	43	306089	306047	minus
Repeat_54	42	206033	206074	plus
Repeat_54	42	233081	233040	minus
Repeat_55	42	133225	133266	plus
Repeat_55	42	194353	194312	minus
Repeat_56	42	120316	120357	plus
Repeat_56	42	335270	335229	minus
Repeat_57	42	355093	355052	minus
Repeat_57	42	97909	97950	plus
Repeat_58	42	13612	13653	plus
Repeat_58	42	325593	325552	minus
Repeat_59	41	393000	392960	minus
Repeat_59	41	357182	357222	plus
Repeat_60	41	171271	171311	plus
Repeat_60	41	340090	340050	minus
Repeat_60	41	371648	371608	minus
Repeat_61	41	166122	166162	plus
Repeat_61	41	199604	199564	minus
Repeat_61	41	376797	376757	minus
Repeat_62	41	68828	68868	plus
Repeat_62	41	111866	111906	plus
Repeat_63	40	319538	319577	plus
Repeat_63	40	325366	325405	plus
Repeat_64	40	303866	303827	minus
Repeat_64	40	292060	292099	plus
Repeat_65	40	191426	191465	plus
Repeat_65	40	202126	202165	plus
Repeat_66	40	130279	130318	plus
Repeat_66	40	272029	272068	plus
Repeat_67	40	122926	122965	plus
Repeat_67	40	202743	202782	plus
Repeat_68	40	110288	110327	plus
Repeat_68	40	118241	118280	plus
Repeat_69	40	95253	95292	plus
Repeat_69	40	250139	250178	plus
Repeat_70	40	89628	89667	plus
Repeat_70	40	350488	350527	plus
Repeat_71	40	1685	1724	plus
Repeat_71	40	92802	92841	plus
Repeat_72	39	354115	354153	plus
Repeat_72	39	411806	411844	plus
Repeat_73	39	260966	261004	plus
Repeat_73	39	392705	392667	minus
Repeat_74	39	260628	260666	plus
Repeat_74	39	349617	349655	plus
Repeat_75	39	110368	110406	plus
Repeat_75	39	346189	346151	minus
Repeat_76	39	102852	102890	plus
Repeat_76	39	319228	319266	plus
Repeat_77	39	54374	54412	plus
Repeat_77	39	389804	389842	plus
Repeat_78	39	51529	51567	plus
Repeat_78	39	148730	148768	plus
Repeat_79	39	41670	41708	plus
Repeat_79	39	136439	136477	plus
Repeat_80	39	33254	33292	plus
Repeat_80	39	362129	362167	plus
Repeat_81	39	26531	26569	plus
Repeat_81	39	193885	193847	minus
Repeat_82	39	7036	7074	plus
Repeat_82	39	25578	25616	plus
Repeat_83	38	368485	368522	plus
Repeat_83	38	398440	398403	minus
Repeat_84	38	269000	269037	plus
Repeat_84	38	298034	297997	minus
Repeat_85	38	258768	258805	plus
Repeat_85	38	260665	260628	minus
Repeat_85	38	349654	349617	minus
Repeat_86	38	258421	258458	plus
Repeat_86	38	335686	335649	minus
Repeat_87	38	206157	206194	plus
Repeat_87	38	232961	232924	minus
Repeat_88	38	155111	155148	plus
Repeat_88	38	242564	242527	minus
Repeat_89	38	143320	143357	plus
Repeat_89	38	282448	282485	plus
Repeat_90	38	141641	141678	plus
Repeat_90	38	191711	191674	minus
Repeat_91	38	133319	133356	plus
Repeat_91	38	345873	345910	plus
Repeat_92	38	125322	125359	plus
Repeat_92	38	322281	322244	minus
Repeat_93	38	122578	122615	plus
Repeat_93	38	254618	254581	minus
Repeat_94	38	96952	96989	plus
Repeat_94	38	352980	353017	plus
Repeat_95	38	141458	141421	minus
Repeat_95	38	92535	92572	plus
Repeat_96	38	90625	90662	plus
Repeat_96	38	91971	91934	minus
Repeat_97	38	26931	26968	plus
Repeat_97	38	117910	117947	plus
Repeat_98	38	26767	26804	plus
Repeat_98	38	303540	303577	plus
Repeat_99	38	20718	20755	plus
Repeat_99	38	414324	414287	minus
Repeat_100	37	351053	351089	plus
Repeat_100	37	411101	411137	plus
Repeat_101	37	291380	291416	plus
Repeat_101	37	400116	400080	minus
Repeat_102	37	253432	253468	plus
Repeat_102	37	300328	300292	minus
Repeat_102	37	358890	358854	minus
Repeat_103	37	227870	227906	plus
Repeat_103	37	309850	309814	minus
Repeat_104	37	220859	220895	plus
Repeat_104	37	396744	396780	plus
Repeat_105	37	201902	201938	plus
Repeat_105	37	336730	336766	plus
Repeat_106	37	173637	173673	plus
Repeat_106	37	261674	261638	minus
Repeat_106	37	369282	369246	minus
Repeat_107	37	171834	171870	plus
Repeat_107	37	324771	324735	minus
Repeat_107	37	371085	371049	minus
Repeat_108	37	164489	164525	plus
Repeat_108	37	300054	300018	minus
Repeat_108	37	378430	378394	minus
Repeat_109	37	205217	205181	minus
Repeat_109	37	106265	106301	plus
Repeat_110	37	100227	100263	plus
Repeat_110	37	334860	334896	plus
Repeat_111	37	91931	91967	plus
Repeat_111	37	286470	286434	minus
Repeat_112	37	82779	82815	plus
Repeat_112	37	354873	354837	minus
Repeat_113	37	81942	81978	plus
Repeat_113	37	121738	121702	minus
Repeat_114	37	54467	54503	plus
Repeat_114	37	55910	55946	plus
Repeat_115	36	285706	285741	plus
Repeat_115	36	411969	411934	minus
Repeat_116	36	252649	252684	plus
Repeat_116	36	267678	267713	plus
Repeat_117	36	252052	252087	plus
Repeat_117	36	403836	403871	plus
Repeat_118	36	240397	240432	plus
Repeat_118	36	316057	316092	plus
Repeat_119	36	199659	199694	plus
Repeat_119	36	318553	318588	plus
Repeat_120	36	399943	399908	minus
Repeat_120	36	189455	189490	plus
Repeat_121	36	340195	340160	minus
Repeat_121	36	179896	179931	plus
Repeat_122	36	177671	177706	plus
Repeat_122	36	269500	269465	minus
Repeat_123	36	154313	154348	plus
Repeat_123	36	295973	295938	minus
Repeat_124	36	140974	141009	plus
Repeat_124	36	150578	150613	plus
Repeat_125	36	165365	165330	minus
Repeat_125	36	135376	135411	plus
Repeat_125	36	377554	377589	plus
Repeat_126	36	106224	106259	plus
Repeat_126	36	325632	325597	minus
Repeat_127	36	97834	97869	plus
Repeat_127	36	120679	120714	plus
Repeat_128	36	96261	96296	plus
Repeat_128	36	263722	263687	minus
Repeat_129	36	69282	69317	plus
Repeat_129	36	396192	396227	plus
Repeat_130	36	60118	60153	plus
Repeat_130	36	356900	356935	plus
Repeat_131	36	127814	127779	minus
Repeat_131	36	55658	55693	plus
Repeat_132	36	392712	392677	minus
Repeat_132	36	40724	40759	plus
Repeat_133	36	5458	5493	plus
Repeat_133	36	29006	28971	minus
Repeat_134	36	5261	5296	plus
Repeat_134	36	127033	126998	minus
Repeat_135	35	318560	318594	plus
Repeat_135	35	385588	385622	plus
Repeat_136	35	278171	278205	plus
Repeat_136	35	392715	392681	minus
Repeat_137	35	276322	276356	plus
Repeat_137	35	356932	356898	minus
Repeat_138	35	249013	249047	plus
Repeat_138	35	261611	261645	plus
Repeat_138	35	266802	266768	minus
Repeat_139	35	239905	239939	plus
Repeat_139	35	343100	343066	minus
Repeat_140	35	215339	215373	plus
Repeat_140	35	273224	273258	plus
Repeat_141	35	201329	201363	plus
Repeat_141	35	360413	360447	plus
Repeat_142	35	334874	334840	minus
Repeat_142	35	193400	193434	plus
Repeat_143	35	191423	191457	plus
Repeat_143	35	194658	194624	minus
Repeat_144	35	187165	187199	plus
Repeat_144	35	226710	226744	plus
Repeat_145	35	164484	164518	plus
Repeat_145	35	330890	330924	plus
Repeat_145	35	378435	378401	minus
Repeat_146	35	163602	163636	plus
Repeat_146	35	270429	270463	plus
Repeat_146	35	379317	379283	minus
Repeat_147	35	156655	156689	plus
Repeat_147	35	201942	201908	minus
Repeat_148	35	148240	148274	plus
Repeat_148	35	368415	368381	minus
Repeat_149	35	141644	141678	plus
Repeat_149	35	191708	191674	minus
Repeat_149	35	258801	258767	minus
Repeat_150	35	136374	136408	plus
Repeat_150	35	243837	243871	plus
Repeat_151	35	113878	113912	plus
Repeat_151	35	190381	190415	plus
Repeat_152	35	111106	111140	plus
Repeat_152	35	136968	136934	minus
Repeat_153	35	103278	103312	plus
Repeat_153	35	263255	263289	plus
Repeat_154	35	101373	101407	plus
Repeat_154	35	338924	338890	minus
Repeat_155	35	92176	92210	plus
Repeat_155	35	390019	389985	minus
Repeat_156	35	80831	80865	plus
Repeat_156	35	173940	173974	plus
Repeat_157	35	58282	58316	plus
Repeat_157	35	241603	241637	plus
Repeat_158	35	56369	56403	plus
Repeat_158	35	398742	398708	minus
Repeat_159	35	222477	222443	minus
Repeat_159	35	51541	51575	plus
Repeat_160	35	47924	47958	plus
Repeat_160	35	300219	300253	plus
Repeat_161	35	319893	319859	minus
Repeat_161	35	39271	39305	plus
Repeat_162	35	35979	36013	plus
Repeat_162	35	346694	346660	minus
Repeat_163	35	327495	327461	minus
Repeat_163	35	32898	32932	plus
Repeat_164	35	29142	29176	plus
Repeat_164	35	357949	357983	plus
Repeat_165	35	28498	28532	plus
Repeat_165	35	174662	174628	minus
Repeat_166	35	28317	28351	plus
Repeat_166	35	114470	114436	minus
Repeat_167	35	18336	18370	plus
Repeat_167	35	30019	29985	minus
Repeat_168	35	9885	9919	plus
Repeat_168	35	174565	174531	minus
Repeat_169	35	8053	8087	plus
Repeat_169	35	120582	120548	minus
Repeat_170	35	3100	3134	plus
Repeat_170	35	186968	187002	plus
Repeat_171	34	352754	352721	minus
Repeat_171	34	278823	278856	plus
Repeat_172	34	265575	265608	plus
Repeat_172	34	350570	350603	plus
Repeat_173	34	226541	226574	plus
Repeat_173	34	250217	250184	minus
Repeat_174	34	201700	201733	plus
Repeat_174	34	268807	268774	minus
Repeat_175	34	187167	187200	plus
Repeat_175	34	351121	351154	plus
Repeat_176	34	187130	187163	plus
Repeat_176	34	361003	360970	minus
Repeat_177	34	186086	186119	plus
Repeat_177	34	219543	219576	plus
Repeat_178	34	238325	238292	minus
Repeat_178	34	185921	185954	plus
Repeat_179	34	191708	191675	minus
Repeat_179	34	258801	258768	minus
Repeat_179	34	141644	141677	plus
Repeat_179	34	260632	260665	plus
Repeat_179	34	349621	349654	plus
Repeat_180	34	140066	140099	plus
Repeat_180	34	307307	307274	minus
Repeat_180	34	346136	346103	minus
Repeat_181	34	137610	137643	plus
Repeat_181	34	177810	177843	plus
Repeat_182	34	354863	354830	minus
Repeat_182	34	129490	129523	plus
Repeat_183	34	8087	8054	minus
Repeat_183	34	286383	286350	minus
Repeat_183	34	120548	120581	plus
Repeat_184	34	107842	107875	plus
Repeat_184	34	295757	295724	minus
Repeat_185	34	102364	102397	plus
Repeat_185	34	278761	278728	minus
Repeat_186	34	94789	94822	plus
Repeat_186	34	266874	266907	plus
Repeat_186	34	302540	302573	plus
Repeat_187	34	92366	92399	plus
Repeat_187	34	280177	280210	plus
Repeat_188	34	90629	90662	plus
Repeat_188	34	91967	91934	minus
Repeat_188	34	286434	286467	plus
Repeat_189	34	90245	90278	plus
Repeat_189	34	390540	390507	minus
Repeat_190	34	85139	85172	plus
Repeat_190	34	116627	116660	plus
Repeat_191	34	78518	78551	plus
Repeat_191	34	247322	247289	minus
Repeat_192	34	51011	51044	plus
Repeat_192	34	396233	396200	minus
Repeat_193	34	401765	401732	minus
Repeat_193	34	24879	24912	plus
Repeat_194	34	23232	23199	minus
Repeat_194	34	24	57	plus
Repeat_194	34	389989	390022	plus
Repeat_195	33	394467	394499	plus
Repeat_195	33	403558	403590	plus
Repeat_196	33	418064	418032	minus
Repeat_196	33	351130	351162	plus
Repeat_197	33	328166	328198	plus
Repeat_197	33	329642	329674	plus
Repeat_198	33	326596	326628	plus
Repeat_198	33	329860	329892	plus
Repeat_199	33	286061	286093	plus
Repeat_199	33	408296	408328	plus
Repeat_200	33	279281	279313	plus
Repeat_200	33	355205	355173	minus
Repeat_201	33	264947	264979	plus
Repeat_201	33	270392	270424	plus
Repeat_202	33	260657	260689	plus
Repeat_202	33	408003	407971	minus
Repeat_203	33	266553	266521	minus
Repeat_203	33	241420	241452	plus
Repeat_204	33	241398	241430	plus
Repeat_204	33	352377	352409	plus
Repeat_205	33	187167	187199	plus
Repeat_205	33	226712	226744	plus
Repeat_205	33	351121	351153	plus
Repeat_206	33	212646	212678	plus
Repeat_206	33	340340	340372	plus
Repeat_207	33	206828	206860	plus
Repeat_207	33	413688	413720	plus
Repeat_208	33	203777	203809	plus
Repeat_208	33	207745	207713	minus
Repeat_209	33	201373	201405	plus
Repeat_209	33	316762	316730	minus
Repeat_210	33	188379	188411	plus
Repeat_210	33	300037	300069	plus
Repeat_211	33	378863	378831	minus
Repeat_211	33	164056	164088	plus
Repeat_211	33	183145	183177	plus
Repeat_212	33	156656	156688	plus
Repeat_212	33	201941	201909	minus
Repeat_212	33	322907	322939	plus
Repeat_213	33	152981	153013	plus
Repeat_213	33	176631	176663	plus
Repeat_214	33	146116	146148	plus
Repeat_214	33	199405	199437	plus
Repeat_215	33	141636	141668	plus
Repeat_215	33	390020	389988	minus
Repeat_216	33	128315	128347	plus
Repeat_216	33	174293	174325	plus
Repeat_217	33	114312	114344	plus
Repeat_217	33	349788	349820	plus
Repeat_218	33	294341	294309	minus
Repeat_218	33	108968	109000	plus
Repeat_219	33	104470	104502	plus
Repeat_219	33	280340	280308	minus
Repeat_220	33	98284	98316	plus
Repeat_220	33	98317	98349	plus
Repeat_221	33	88341	88373	plus
Repeat_221	33	332357	332389	plus
Repeat_222	33	73079	73111	plus
Repeat_222	33	214714	214746	plus
Repeat_223	33	60118	60150	plus
Repeat_223	33	356900	356932	plus
Repeat_223	33	276354	276322	minus
Repeat_224	33	52560	52592	plus
Repeat_224	33	320020	319988	minus
Repeat_225	33	51569	51601	plus
Repeat_225	33	148770	148802	plus
Repeat_225	33	266464	266496	plus
Repeat_226	33	41030	41062	plus
Repeat_226	33	199086	199054	minus
Repeat_227	33	284805	284773	minus
Repeat_227	33	380117	380085	minus
Repeat_227	33	28767	28799	plus
Repeat_227	33	162802	162834	plus
Repeat_228	33	186651	186619	minus
Repeat_228	33	25683	25715	plus
Repeat_229	33	14954	14986	plus
Repeat_229	33	289436	289468	plus
Repeat_230	33	6318	6350	plus
Repeat_230	33	296219	296251	plus
Repeat_231	33	23233	23201	minus
Repeat_231	33	310008	309976	minus
Repeat_231	33	23	55	plus
Repeat_232	32	407280	407311	plus
Repeat_232	32	415711	415742	plus
Repeat_233	32	385905	385936	plus
Repeat_233	32	398011	398042	plus
Repeat_234	32	362102	362133	plus
Repeat_234	32	397387	397356	minus
Repeat_235	32	334968	334999	plus
Repeat_235	32	337529	337498	minus
Repeat_236	32	272040	272071	plus
Repeat_236	32	410619	410650	plus
Repeat_237	32	263396	263427	plus
Repeat_237	32	269036	269005	minus
Repeat_237	32	297998	298029	plus
Repeat_238	32	247037	247068	plus
Repeat_238	32	333513	333544	plus
Repeat_239	32	242412	242443	plus
Repeat_239	32	334846	334877	plus
Repeat_240	32	228300	228331	plus
Repeat_240	32	286624	286593	minus
Repeat_241	32	212199	212230	plus
Repeat_241	32	385895	385864	minus
Repeat_242	32	205535	205566	plus
Repeat_242	32	205751	205720	minus
Repeat_243	32	199050	199081	plus
Repeat_243	32	337445	337414	minus
Repeat_244	32	191457	191426	minus
Repeat_244	32	194624	194655	plus
Repeat_244	32	202157	202126	minus
Repeat_245	32	185170	185201	plus
Repeat_245	32	338348	338379	plus
Repeat_246	32	174001	174032	plus
Repeat_246	32	249489	249520	plus
Repeat_247	32	172476	172507	plus
Repeat_247	32	315987	315956	minus
Repeat_247	32	370443	370412	minus
Repeat_248	32	164046	164077	plus
Repeat_248	32	189538	189507	minus
Repeat_248	32	378873	378842	minus
Repeat_249	32	143167	143198	plus
Repeat_249	32	282295	282326	plus
Repeat_250	32	140968	140999	plus
Repeat_250	32	328235	328266	plus
Repeat_251	32	133568	133599	plus
Repeat_251	32	332493	332524	plus
Repeat_252	32	122582	122613	plus
Repeat_252	32	126870	126901	plus
Repeat_252	32	254614	254583	minus
Repeat_253	32	119261	119292	plus
Repeat_253	32	121229	121260	plus
Repeat_254	32	109348	109379	plus
Repeat_254	32	201408	201377	minus
Repeat_255	32	102820	102851	plus
Repeat_255	32	316080	316049	minus
Repeat_256	32	95188	95219	plus
Repeat_256	32	174637	174668	plus
Repeat_257	32	92176	92207	plus
Repeat_257	32	141637	141668	plus
Repeat_257	32	390019	389988	minus
Repeat_258	32	92175	92206	plus
Repeat_258	32	324169	324138	minus
Repeat_259	32	87132	87163	plus
Repeat_259	32	303797	303828	plus
Repeat_260	32	87125	87156	plus
Repeat_260	32	187236	187205	minus
Repeat_261	32	81867	81898	plus
Repeat_261	32	260029	259998	minus
Repeat_262	32	78657	78688	plus
Repeat_262	32	358366	358397	plus
Repeat_263	32	65773	65804	plus
Repeat_263	32	250079	250110	plus
Repeat_264	32	56401	56432	plus
Repeat_264	32	95373	95404	plus
Repeat_265	32	53084	53115	plus
Repeat_265	32	412652	412621	minus
Repeat_266	32	51675	51706	plus
Repeat_266	32	52624	52593	minus
Repeat_267	32	41895	41926	plus
Repeat_267	32	277574	277543	minus
Repeat_268	32	40724	40755	plus
Repeat_268	32	278174	278205	plus
Repeat_268	32	392712	392681	minus
Repeat_269	32	34117	34148	plus
Repeat_269	32	294342	294311	minus
Repeat_270	32	30743	30774	plus
Repeat_270	32	136932	136963	plus
Repeat_271	32	24289	24320	plus
Repeat_271	32	305449	305418	minus
Repeat_272	32	20723	20754	plus
Repeat_272	32	264396	264427	plus
Repeat_272	32	414319	414288	minus
Repeat_273	32	16682	16713	plus
Repeat_273	32	327867	327836	minus
Repeat_274	32	3725	3756	plus
Repeat_274	32	270434	270403	minus
Repeat_275	32	2626	2657	plus
Repeat_275	32	212640	212609	minus
Repeat_276	32	24	55	plus
Repeat_276	32	23232	23201	minus
Repeat_276	32	141667	141636	minus
Repeat_276	32	310007	309976	minus
Repeat_276	32	389989	390020	plus
Repeat_277	32	23	54	plus
Repeat_277	32	23233	23202	minus
Repeat_277	32	310008	309977	minus
Repeat_277	32	324137	324168	plus
Repeat_278	31	401901	401931	plus
Repeat_278	31	414708	414738	plus
Repeat_279	31	354611	354641	plus
Repeat_279	31	412786	412756	minus
Repeat_280	31	343217	343247	plus
Repeat_280	31	398735	398705	minus
Repeat_281	31	340675	340705	plus
Repeat_281	31	392683	392653	minus
Repeat_282	31	267254	267284	plus
Repeat_282	31	289612	289582	minus
Repeat_283	31	388697	388667	minus
Repeat_283	31	263847	263877	plus
Repeat_284	31	262408	262438	plus
Repeat_284	31	398007	398037	plus
Repeat_285	31	248602	248632	plus
Repeat_285	31	418587	418617	plus
Repeat_286	31	227817	227847	plus
Repeat_286	31	285609	285639	plus
Repeat_287	31	226363	226393	plus
Repeat_287	31	319538	319568	plus
Repeat_287	31	325366	325396	plus
Repeat_288	31	363891	363861	minus
Repeat_288	31	217978	218008	plus
Repeat_289	31	212791	212821	plus
Repeat_289	31	336243	336273	plus
Repeat_290	31	210971	211001	plus
Repeat_290	31	418798	418828	plus
Repeat_291	31	189951	189981	plus
Repeat_291	31	214649	214619	minus
Repeat_292	31	361648	361618	minus
Repeat_292	31	189110	189140	plus
Repeat_293	31	185160	185190	plus
Repeat_293	31	397685	397715	plus
Repeat_294	31	184618	184648	plus
Repeat_294	31	241778	241748	minus
Repeat_295	31	163191	163221	plus
Repeat_295	31	379728	379698	minus
Repeat_295	31	388087	388057	minus
Repeat_296	31	162174	162204	plus
Repeat_296	31	237098	237068	minus
Repeat_296	31	380745	380715	minus
Repeat_297	31	156659	156689	plus
Repeat_297	31	201938	201908	minus
Repeat_297	31	336766	336736	minus
Repeat_298	31	156657	156687	plus
Repeat_298	31	188035	188005	minus
Repeat_298	31	201940	201910	minus
Repeat_298	31	322908	322938	plus
Repeat_299	31	357321	357291	minus
Repeat_299	31	147470	147500	plus
Repeat_300	31	23202	23232	plus
Repeat_300	31	92176	92206	plus
Repeat_300	31	141637	141667	plus
Repeat_300	31	309977	310007	plus
Repeat_300	31	54	24	minus
Repeat_300	31	324168	324138	minus
Repeat_300	31	390019	389989	minus
Repeat_301	31	141281	141311	plus
Repeat_301	31	395929	395959	plus
Repeat_302	31	140307	140337	plus
Repeat_302	31	354735	354765	plus
Repeat_303	31	322275	322245	minus
Repeat_303	31	124530	124560	plus
Repeat_303	31	125328	125358	plus
Repeat_304	31	8087	8057	minus
Repeat_304	31	120548	120578	plus
Repeat_304	31	254645	254615	minus
Repeat_304	31	286383	286353	minus
Repeat_305	31	120458	120488	plus
Repeat_305	31	221589	221559	minus
Repeat_306	31	119337	119367	plus
Repeat_306	31	222027	221997	minus
Repeat_307	31	115539	115569	plus
Repeat_307	31	352361	352391	plus
Repeat_308	31	105696	105726	plus
Repeat_308	31	107203	107173	minus
Repeat_309	31	263720	263690	minus
Repeat_309	31	96263	96293	plus
Repeat_309	31	345644	345674	plus
Repeat_310	31	90497	90527	plus
Repeat_310	31	345353	345383	plus
Repeat_311	31	116989	116959	minus
Repeat_311	31	76920	76950	plus
Repeat_312	31	356936	356906	minus
Repeat_312	31	69482	69512	plus
Repeat_313	31	61098	61128	plus
Repeat_313	31	259015	258985	minus
Repeat_314	31	60407	60437	plus
Repeat_314	31	388448	388418	minus
Repeat_315	31	41676	41706	plus
Repeat_315	31	90500	90530	plus
Repeat_315	31	136445	136475	plus
Repeat_316	31	37495	37525	plus
Repeat_316	31	124517	124487	minus
Repeat_317	31	294341	294311	minus
Repeat_317	31	34118	34148	plus
Repeat_317	31	108968	108998	plus
Repeat_318	31	28384	28414	plus
Repeat_318	31	250118	250148	plus
Repeat_319	31	21360	21390	plus
Repeat_319	31	206833	206863	plus
Repeat_320	31	13657	13687	plus
Repeat_320	31	111865	111895	plus
Repeat_321	31	107405	107375	minus
Repeat_321	31	4771	4801	plus
Repeat_322	31	20103	20073	minus
Repeat_322	31	4711	4741	plus
Repeat_323	31	3283	3313	plus
Repeat_323	31	101460	101490	plus
Repeat_324	31	23232	23202	minus
Repeat_324	31	92206	92176	minus
Repeat_324	31	141667	141637	minus
Repeat_324	31	310007	309977	minus
Repeat_324	31	24	54	plus
Repeat_324	31	324138	324168	plus
Repeat_324	31	389989	390019	plus
Repeat_325	30	388463	388492	plus
Repeat_325	30	396311	396282	minus
Repeat_326	30	398439	398410	minus
Repeat_326	30	368486	368515	plus
Repeat_326	30	404521	404550	plus
Repeat_327	30	156659	156688	plus
Repeat_327	30	201938	201909	minus
Repeat_327	30	322910	322939	plus
Repeat_327	30	336766	336737	minus
Repeat_328	30	320380	320409	plus
Repeat_328	30	329783	329754	minus
Repeat_329	30	300025	300054	plus
Repeat_329	30	378401	378430	plus
Repeat_329	30	164518	164489	minus
Repeat_329	30	330924	330895	minus
Repeat_330	30	295688	295717	plus
Repeat_330	30	321846	321817	minus
Repeat_331	30	288957	288986	plus
Repeat_331	30	330767	330738	minus
Repeat_332	30	278360	278389	plus
Repeat_332	30	393319	393348	plus
Repeat_333	30	260551	260580	plus
Repeat_333	30	260835	260806	minus
Repeat_334	30	260197	260226	plus
Repeat_334	30	260576	260605	plus
Repeat_335	30	214177	214206	plus
Repeat_335	30	251137	251166	plus
Repeat_336	30	191206	191235	plus
Repeat_336	30	207963	207934	minus
Repeat_337	30	190998	191027	plus
Repeat_337	30	269039	269010	minus
Repeat_338	30	182732	182761	plus
Repeat_338	30	308534	308505	minus
Repeat_339	30	177543	177572	plus
Repeat_339	30	271041	271012	minus
Repeat_340	30	174003	174032	plus
Repeat_340	30	203340	203311	minus
Repeat_340	30	249491	249520	plus
Repeat_341	30	170742	170771	plus
Repeat_341	30	200157	200186	plus
Repeat_341	30	372177	372148	minus
Repeat_342	30	147559	147588	plus
Repeat_342	30	249484	249513	plus
Repeat_343	30	144583	144612	plus
Repeat_343	30	406010	405981	minus
Repeat_344	30	128589	128618	plus
Repeat_344	30	172627	172598	minus
Repeat_344	30	370292	370321	plus
Repeat_345	30	124228	124257	plus
Repeat_345	30	132597	132626	plus
Repeat_346	30	262438	262409	minus
Repeat_346	30	398037	398008	minus
Repeat_346	30	119504	119533	plus
Repeat_347	30	115826	115855	plus
Repeat_347	30	117612	117641	plus
Repeat_348	30	114569	114598	plus
Repeat_348	30	308982	309011	plus
Repeat_349	30	111069	111098	plus
Repeat_349	30	143797	143826	plus
Repeat_350	30	95257	95286	plus
Repeat_350	30	250143	250172	plus
Repeat_350	30	348069	348040	minus
Repeat_351	30	95189	95218	plus
Repeat_351	30	174638	174667	plus
Repeat_351	30	266520	266491	minus
Repeat_352	30	90584	90613	plus
Repeat_352	30	94369	94340	minus
Repeat_353	30	85288	85317	plus
Repeat_353	30	276683	276654	minus
Repeat_354	30	85182	85211	plus
Repeat_354	30	91229	91258	plus
Repeat_355	30	80696	80725	plus
Repeat_355	30	303264	303293	plus
Repeat_356	30	75502	75531	plus
Repeat_356	30	286267	286296	plus
Repeat_357	30	130003	129974	minus
Repeat_357	30	74685	74714	plus
Repeat_358	30	63348	63377	plus
Repeat_358	30	398357	398386	plus
Repeat_359	30	60124	60153	plus
Repeat_359	30	69512	69483	minus
Repeat_359	30	356906	356935	plus
Repeat_360	30	58687	58716	plus
Repeat_360	30	135446	135417	minus
Repeat_361	30	56555	56584	plus
Repeat_361	30	147641	147670	plus
Repeat_362	30	392952	392923	minus
Repeat_362	30	56305	56334	plus
Repeat_363	30	55502	55531	plus
Repeat_363	30	329680	329709	plus
Repeat_364	30	52560	52589	plus
Repeat_364	30	95751	95722	minus
Repeat_364	30	320020	319991	minus
Repeat_365	30	39044	39073	plus
Repeat_365	30	407029	407058	plus
Repeat_366	30	35874	35903	plus
Repeat_366	30	37379	37408	plus
Repeat_366	30	130533	130504	minus
Repeat_367	30	34118	34147	plus
Repeat_367	30	108968	108997	plus
Repeat_367	30	250917	250888	minus
Repeat_367	30	294341	294312	minus
Repeat_368	30	32114	32143	plus
Repeat_368	30	32770	32741	minus
Repeat_369	30	30745	30774	plus
Repeat_369	30	111140	111111	minus
Repeat_369	30	136934	136963	plus
Repeat_370	30	187926	187897	minus
Repeat_370	30	28383	28412	plus
Repeat_371	30	27787	27816	plus
Repeat_371	30	268830	268801	minus
Repeat_372	30	414320	414291	minus
Repeat_372	30	418288	418259	minus
Repeat_372	30	20722	20751	plus
Repeat_373	30	14201	14230	plus
Repeat_373	30	295432	295461	plus
Repeat_374	30	13658	13687	plus
Repeat_374	30	68828	68857	plus
Repeat_374	30	111866	111895	plus
Repeat_375	30	13621	13650	plus
Repeat_375	30	295463	295434	minus
Repeat_375	30	325584	325555	minus
Repeat_376	30	4779	4808	plus
Repeat_376	30	28405	28376	minus
Repeat_377	30	23	52	plus
Repeat_377	30	16682	16711	plus
Repeat_377	30	23233	23204	minus
Repeat_377	30	310008	309979	minus
Repeat_377	30	324137	324166	plus
Repeat_377	30	327867	327838	minus
